# Supplementary material for: Carboxyl Functionalization of N-MWCNTs with Stone–Wales Defects and Possibility of HIF-1α Wave-Diffusive Delivery
Source: MDPI journal article supplement (doi:10.3390/ijms24021296), 2023-01-09
Supplement: s1 [file s1]

# Carboxyl Functionalization of N-MWCNTs with Stone-Wales Defects and Possibility of HIF-1 $\alpha$ Wave-diffusive Delivery

Vladislav V. Shunaev <sup>1</sup>, Nadezhda G. Bobenko <sup>2</sup>, Petr M. Korusenko <sup>3</sup>, Valeriy E. Egorushkin <sup>2</sup>, and Olga E. Glukhova <sup>1,4,\*</sup>

<sup>1</sup> Department of Physics, Saratov State University, 410012 Saratov, Russia

<sup>2</sup> Laboratory of physics of nonlinear media, Institute of Strength Physics and Materials Science of SB RAS, 2/4 Academicheskoy Avenue, Tomsk 634021, Russia

<sup>3</sup> Department of Physics, Omsk State Technical University, 11 Mira Pros., 644050 Omsk, Russia

<sup>4</sup> Institute for Bionic Technologies and Engineering, Sechenov University 119991 Moscow, Russia

\* Correspondence: [glukhovaoe@sgu.ru](mailto:glukhovaoe@sgu.ru); Tel.: +7-8452-514562

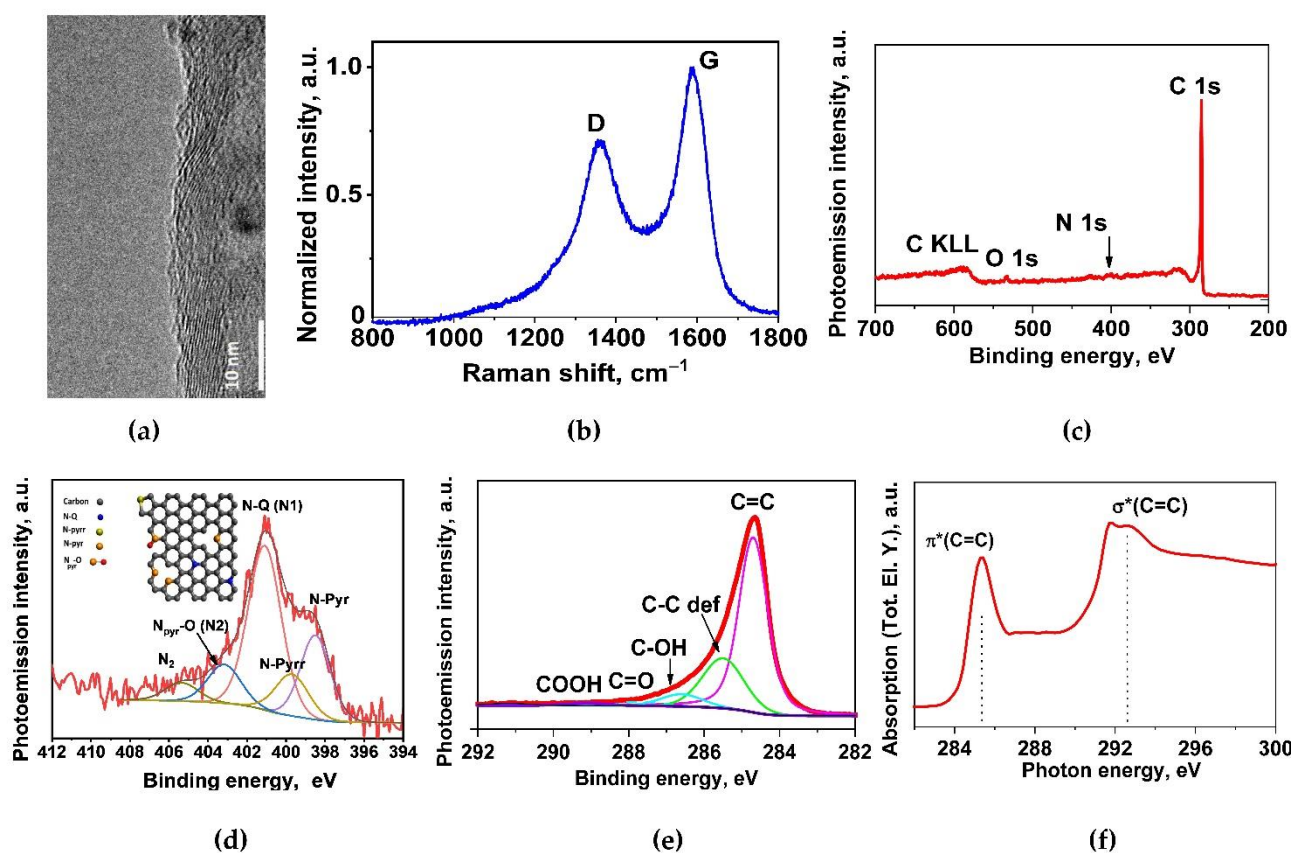

**Figure S1.** Experimental data on atomic and electronic structure of N-MWCNTs before irradiation: (a) TEM, (b) normalized and baseline corrected Raman spectra, (c) survey and (d) core-level N1s (N-Pyr – nitrogen in pyridinic configuration; N-Pyrr – nitrogen in pyrrolic configuration; N<sub>2</sub> – molecular nitrogen), (e) C1s PE spectra of N-MWCNTs, and (f) their NEXAFS C1s spectrum.

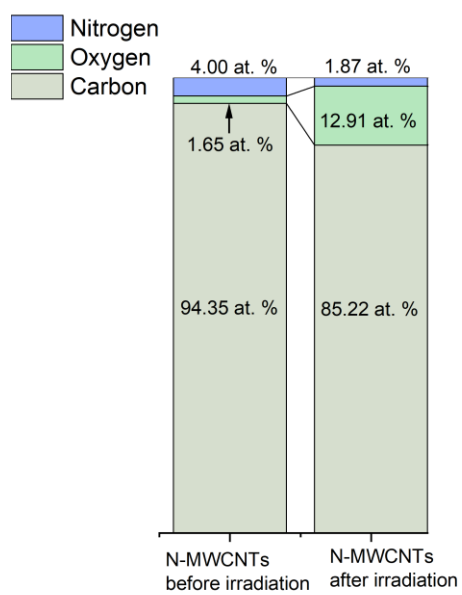

**Figure S2.** Diagram of atomic concentration from survey PE spectra for initial and irradiated N-MWCNTs
